# Supplementary material
Source: Springer Nature journal article supplement (https://www.springermedizin.de/resource/supplementary/13031_2009_47_MOESM1_ESM.pdf/9645024)
Supplement: MOESM1 [file 9645024]

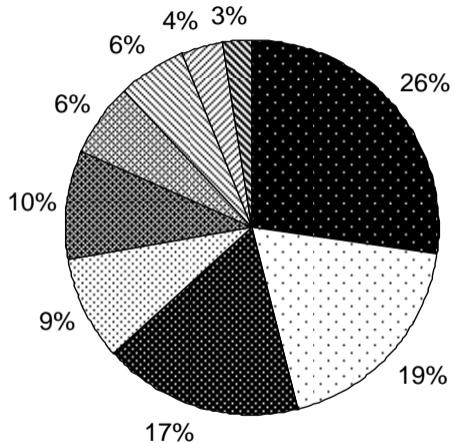

■ No Problems /DK

□ No access to Education/Jobs

■ Alcohol & Drugs

□ Early Marriages

■ Adultery/sexual Behaviour/Violence

□ Health Problems

■ Unclear Future

□ Family Problems

■ Culture/Tradition
